# Supplementary material
Source: PubMed Central journal article supplement (PMC5993611)
Supplement: NIHMS957288-supplement-1.pdf [file NIHMS957288-supplement-1.pdf]

## SUPPLEMENTARY MATERIAL

**Table S1: Items from Parkinson’s Disease and Depression Scales Used in Suicidality Analyses**

| Scale                                                            | Scale Items/Questions (Q)                                                 | Scoring                                                                                                                                                                                                                                                                                                                                                   |
|------------------------------------------------------------------|---------------------------------------------------------------------------|-----------------------------------------------------------------------------------------------------------------------------------------------------------------------------------------------------------------------------------------------------------------------------------------------------------------------------------------------------------|
| <b>Parkinson’s Disease Scales</b>                                |                                                                           |                                                                                                                                                                                                                                                                                                                                                           |
| UPDRS-II (Activities of Daily Living)                            | Total “off” (Q5-Q17)<br>Total “on” (Q5-Q17)                               | 0 to 52                                                                                                                                                                                                                                                                                                                                                   |
| UPDRS-III (Motor Examination)                                    | Total (Q18-Q31)                                                           | 0 to 108                                                                                                                                                                                                                                                                                                                                                  |
| UPDRS-IV, Section B (Clinical Fluctuations)                      | Q36: “Are ‘off’ periods predictable?”                                     | 0 = No; 1 = Yes                                                                                                                                                                                                                                                                                                                                           |
|                                                                  | Q37: “Are ‘off’ periods unpredictable?”                                   | 0 = No; 1 = Yes                                                                                                                                                                                                                                                                                                                                           |
|                                                                  | Q38: “Do ‘off’ periods come on suddenly, within a few seconds?”           | 0 = No; 1 = Yes                                                                                                                                                                                                                                                                                                                                           |
|                                                                  | Q39: “What proportion of the waking day is the patient ‘off’ on average?” | 0 = None<br>1 = 1-25%<br>2 = 26-50%<br>3 = 51-75%<br>4 = 76-100%                                                                                                                                                                                                                                                                                          |
| Self-reported motor fluctuation history                          | Have you experienced on/off symptoms?                                     | Yes or No                                                                                                                                                                                                                                                                                                                                                 |
|                                                                  | If so, are they being treated?                                            | Yes or No                                                                                                                                                                                                                                                                                                                                                 |
| <b>Depression Scales</b>                                         |                                                                           |                                                                                                                                                                                                                                                                                                                                                           |
| Self-reported Mood fluctuations                                  | N/A                                                                       | 0 = No<br>1 = Mild<br>2 = Moderate<br>3 = Severe                                                                                                                                                                                                                                                                                                          |
| Hamilton Depression Rating Scale (HAM-D-17)                      | Q11: Suicide                                                              | 0 = Suicidal thoughts absent<br>1 = Feels life is not worth living<br>2 = Wishes he were dead or any thoughts of possible death to self<br>3 = Suicidal ideas or gestures<br>4 = Attempts at suicide                                                                                                                                                      |
| Montgomery–Åsberg Depression Rating Scale (MADRS)                | Q10: Suicidal Thoughts                                                    | 0 = Enjoys life or takes it as it comes.<br>2 = Weary of life. Only fleeting suicidal thoughts.<br>4 = Probably better off dead. Suicidal thoughts are common and suicide is considered as a possible solution, but without specific plans or intention.<br>6 = Explicit plans for suicide when there is an opportunity, Active preparations for suicide. |
| Inventory of Depressive Symptomatology – Clinician Rated (IDS-C) | Q18: Suicidal Ideation                                                    | 0 = Does not think of suicide or death<br>1 = Feels life is empty or is not worth living<br>2 = Thinks of suicide/death several times a week for several minutes<br>3 = Thinks of suicide/death several times a day in-depth, or has made specific plans, or attempted suicide                                                                            |
| Beck Depression Inventory (BDI)                                  | Q9: Suicidal Thoughts                                                     | 0 = I don't have any thoughts of killing myself.<br>1 = I have thoughts of killing myself, but I would not carry them out.<br>2 = I would like to kill myself.<br>3 = I would kill myself if I had the chance.                                                                                                                                            |

**Table S2: Smoothing parameters and significance estimates from non-parametric analysis of covariance**

| <b>Covariate</b>                            | <b>Outcome variable</b> | <b>Smoothing parameter (h)</b> | <b>p</b> |
|---------------------------------------------|-------------------------|--------------------------------|----------|
| UPDRS-II (activities of daily living) score | MADRS score             | 2.62178                        | 0.0028   |
|                                             | HAM-D-17 score          | 2.62178                        | 0.0024   |
|                                             | IDS-C score             | 2.62178                        | 0.0018   |
|                                             | BDI score               | 2.62041                        | 0.0019   |
|                                             | PDQ-8 score             | 2.62178                        | 0.145    |
| UPDRS-III (motor impairment) score          | MADRS score             | 4.35498                        | 0.0006   |
|                                             | HAM-D-17 score          | 4.35498                        | 0.0005   |
|                                             | IDS-C score             | 4.35498                        | 0.0007   |
|                                             | BDI score               | 4.35282                        | 0.001    |
|                                             | PDQ-8 score             | 4.35498                        | 0.298    |
